# Supplementary material
Source: PubMed Central journal article supplement (PMC5749505)
Supplement: jci-128-95410-s001.pdf [file jci-128-95410-s001.pdf]

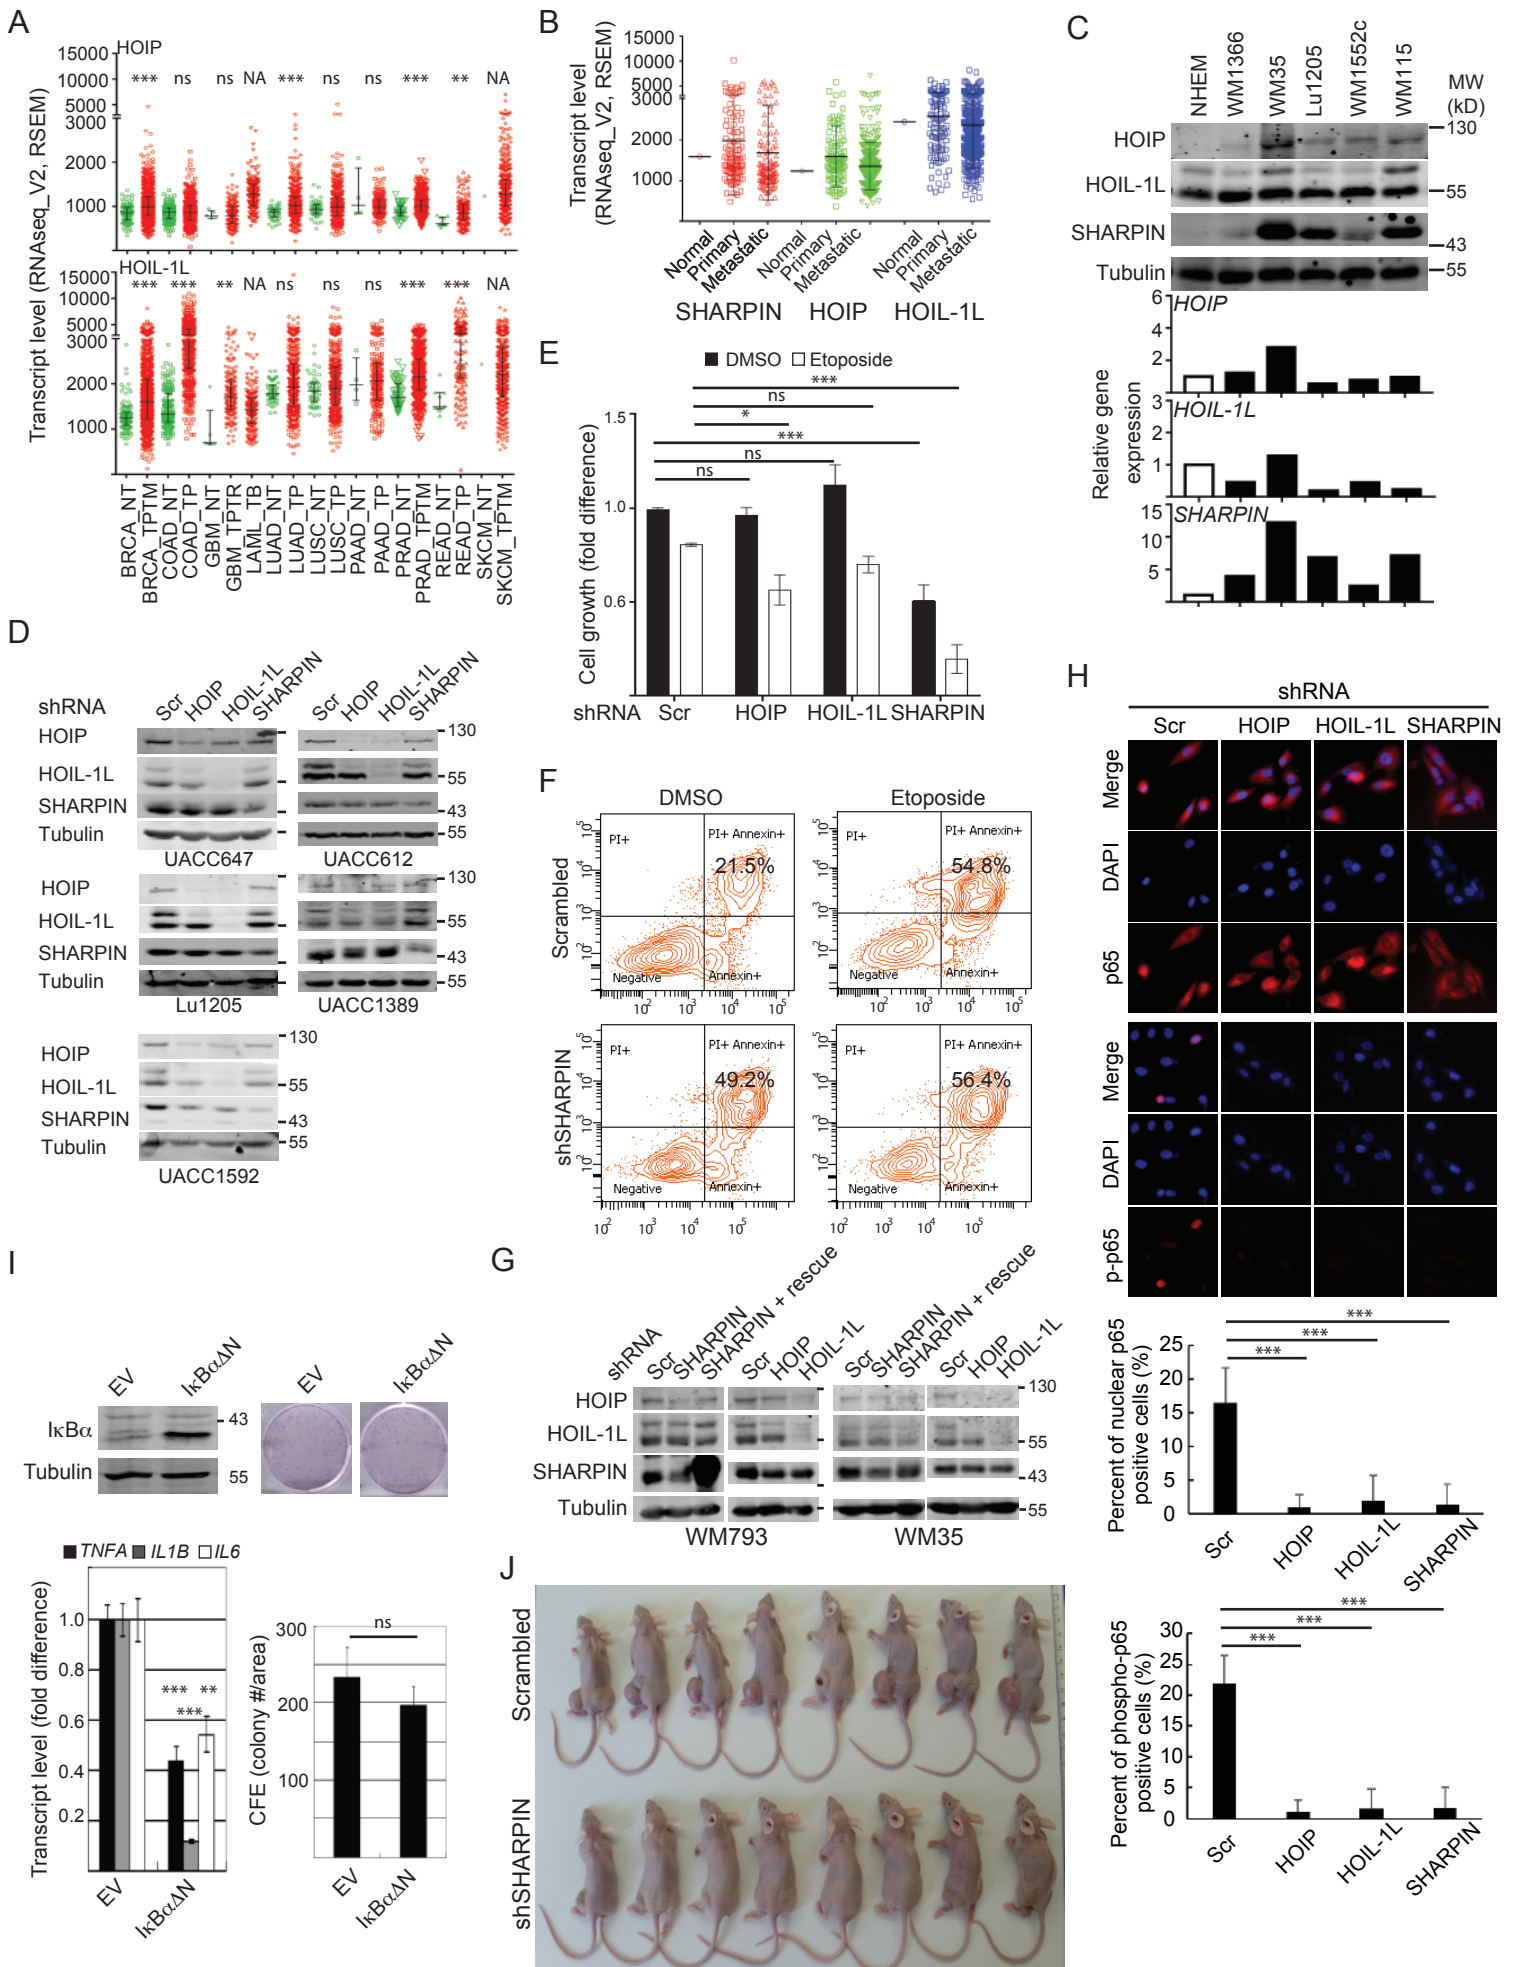

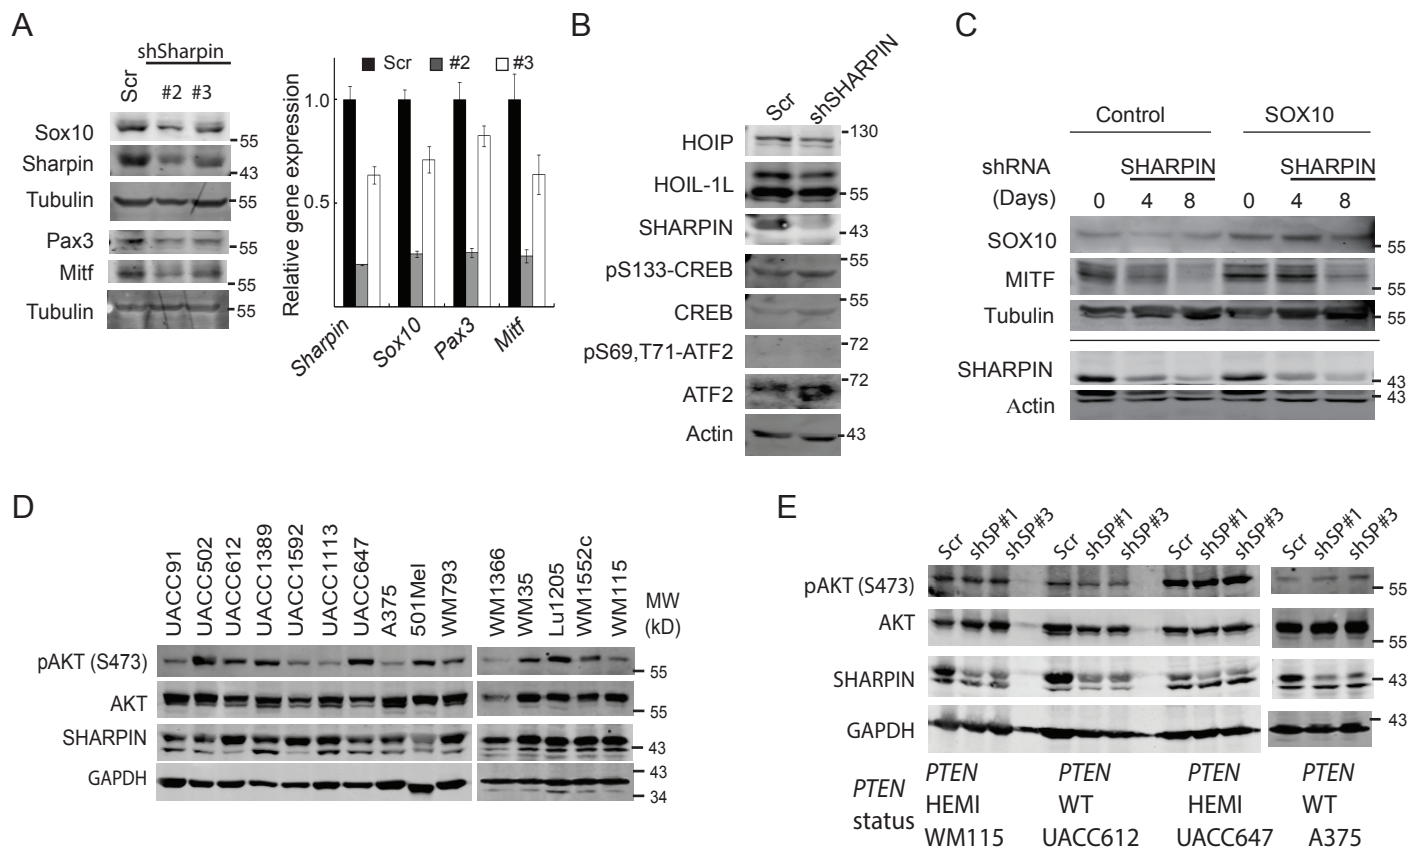

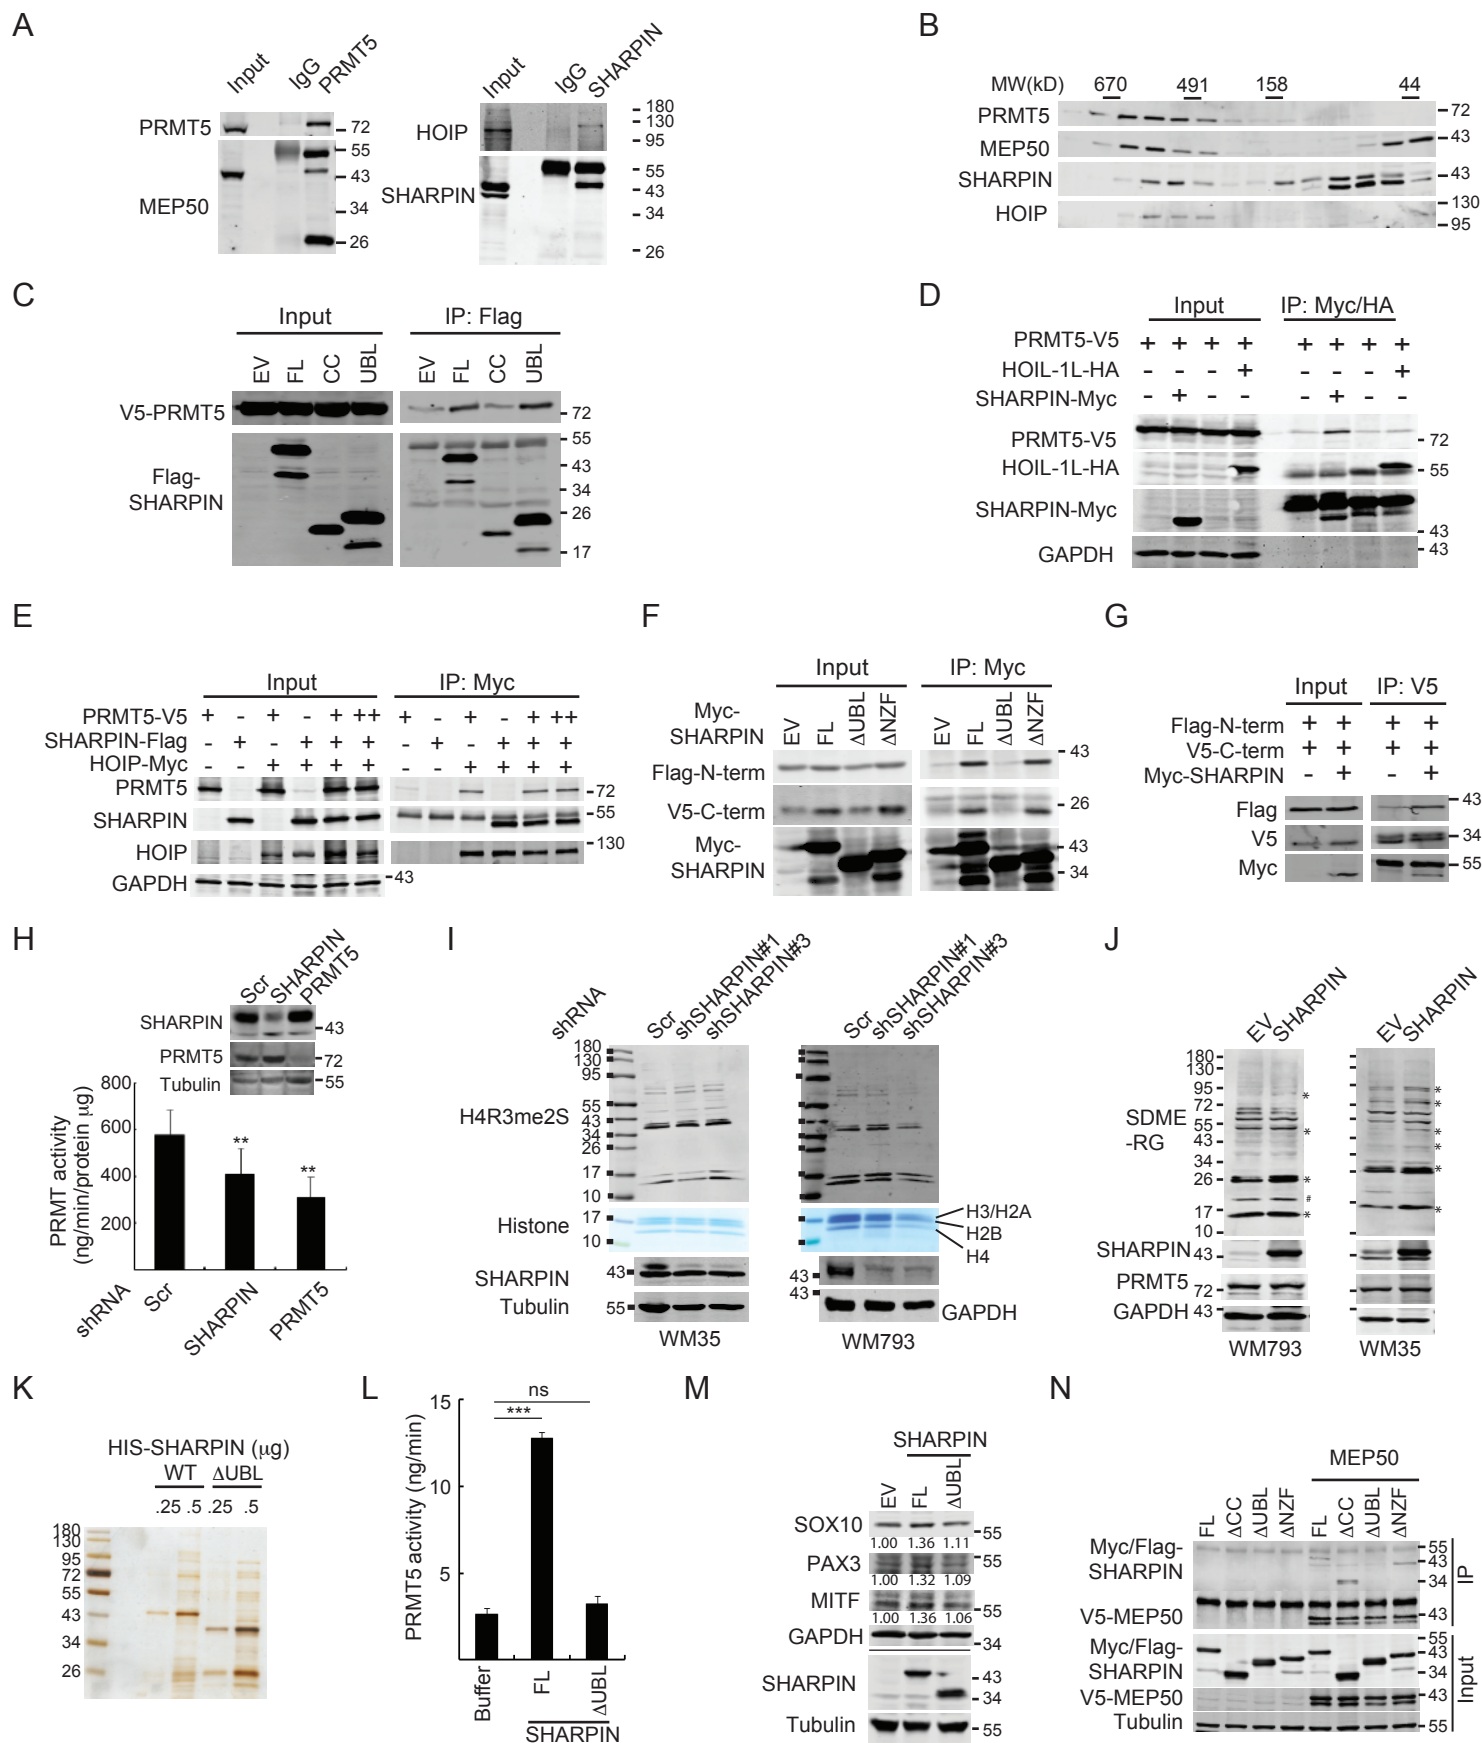

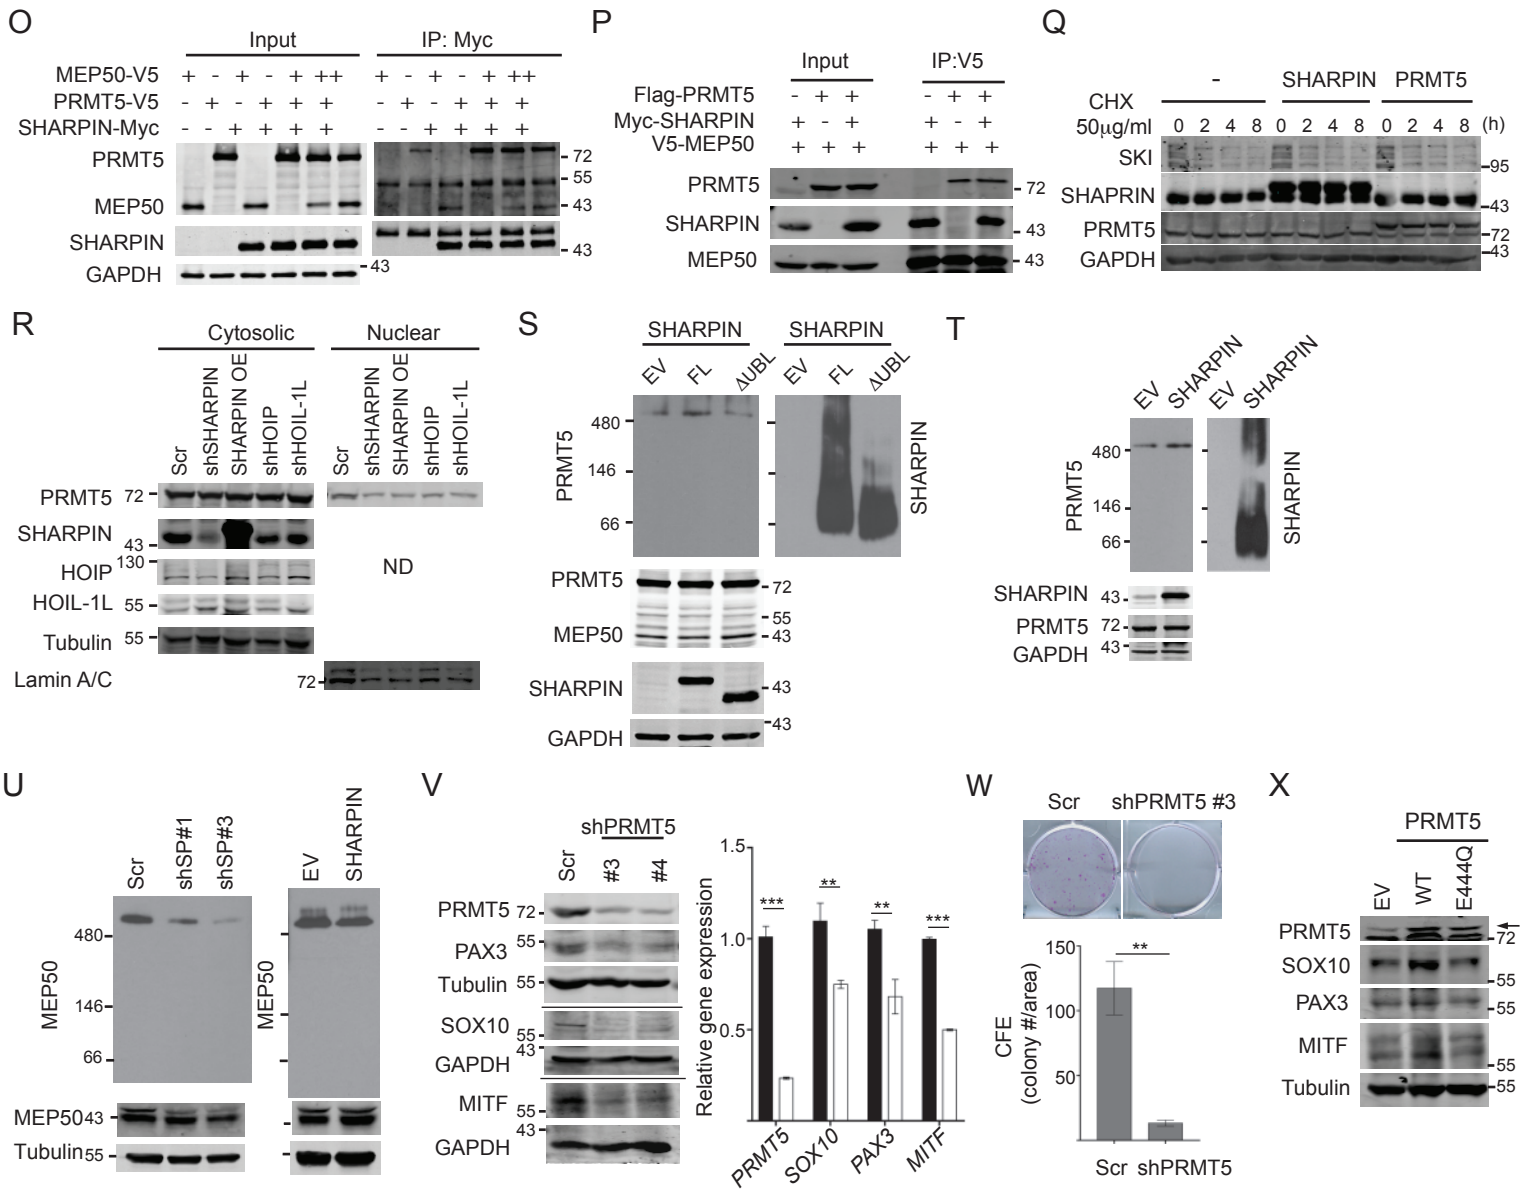

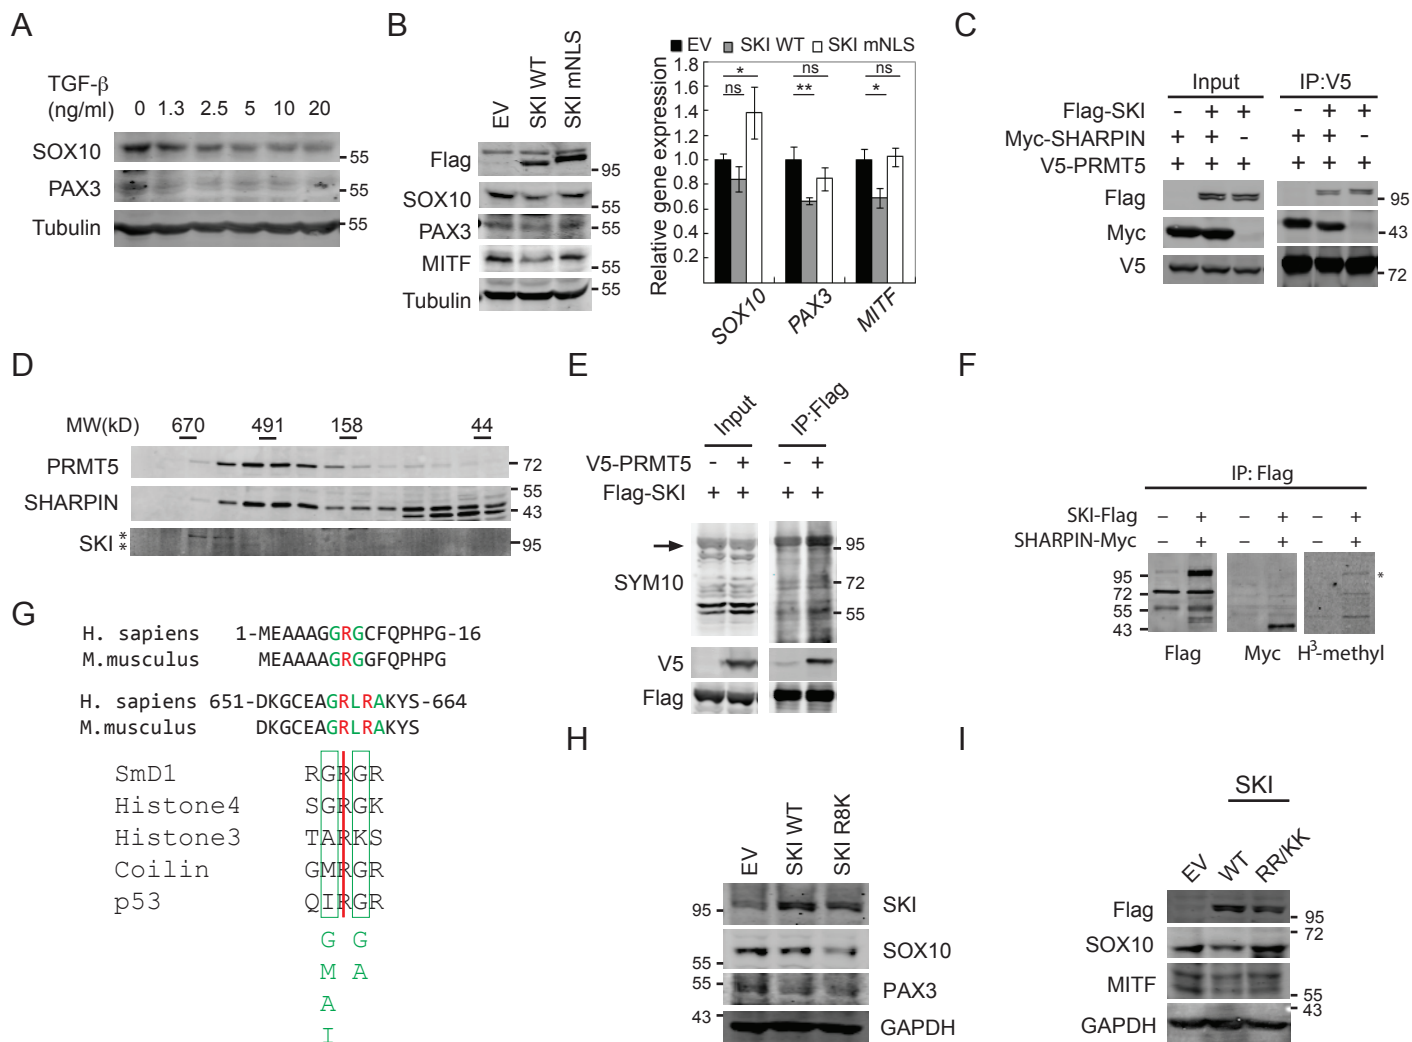

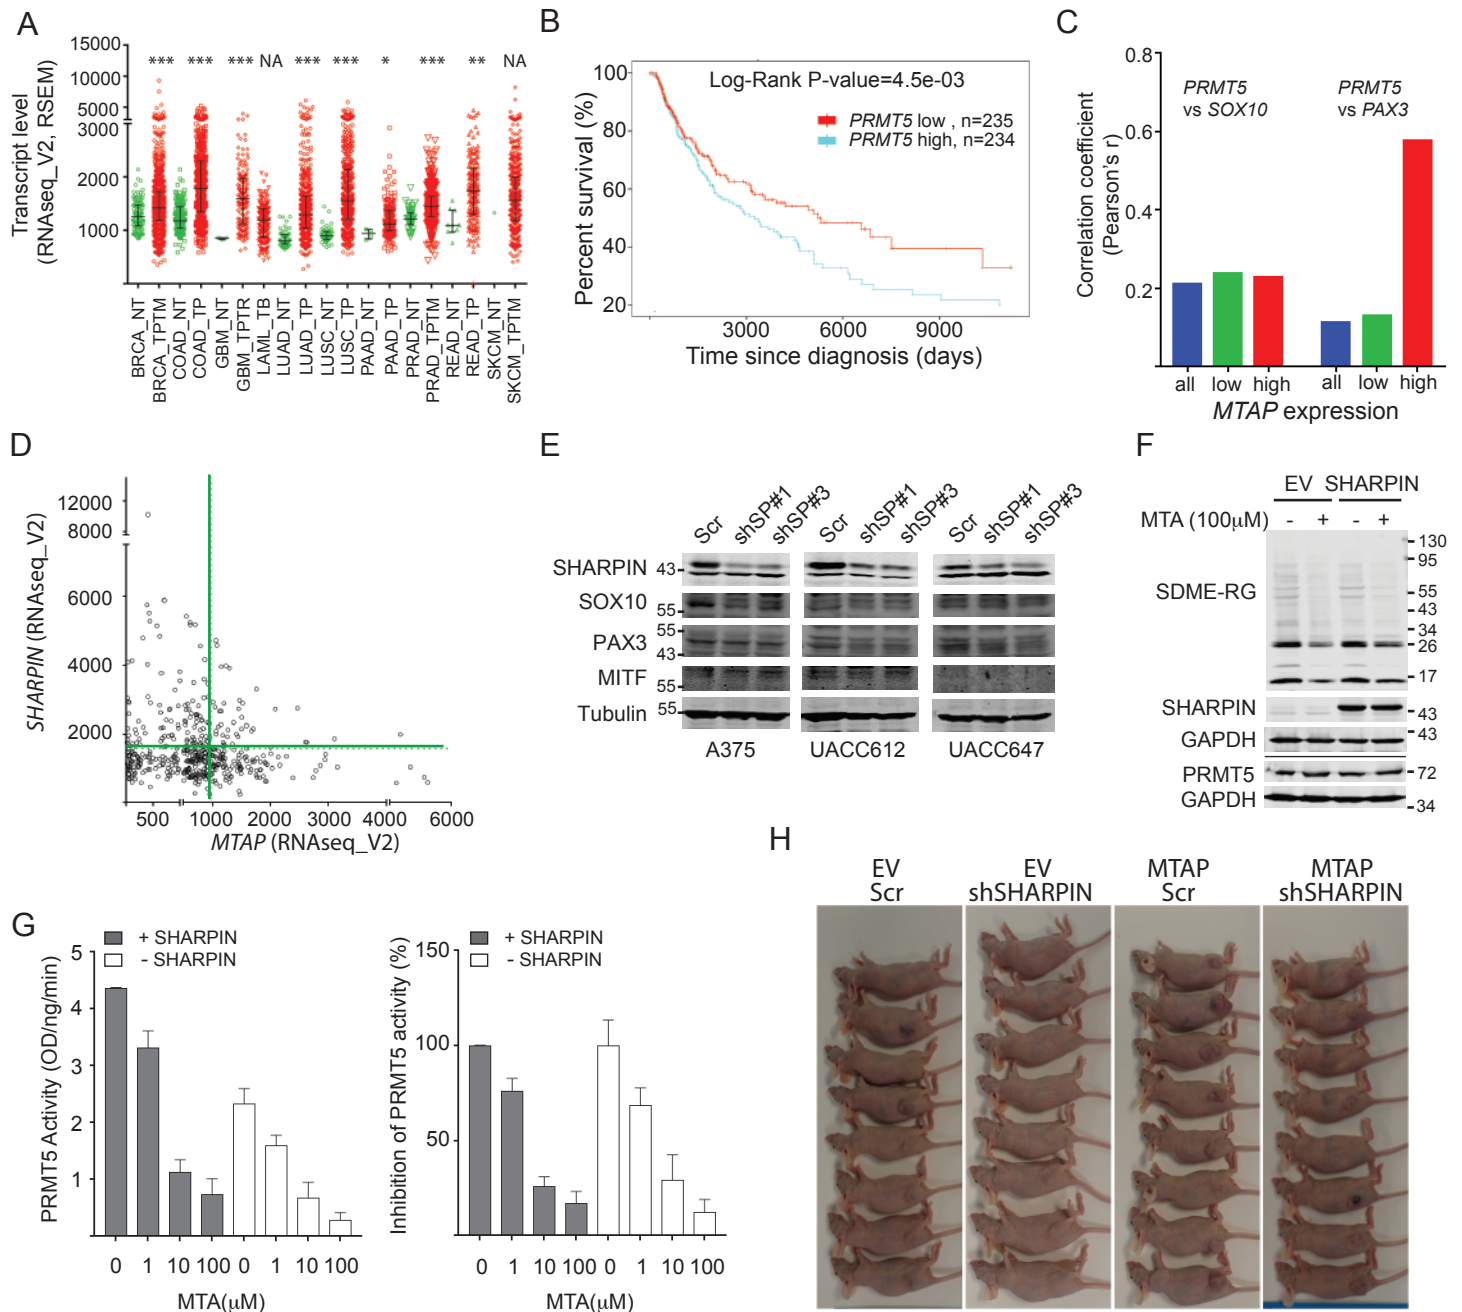

Supplementary Figure S6, Tamiya et al.

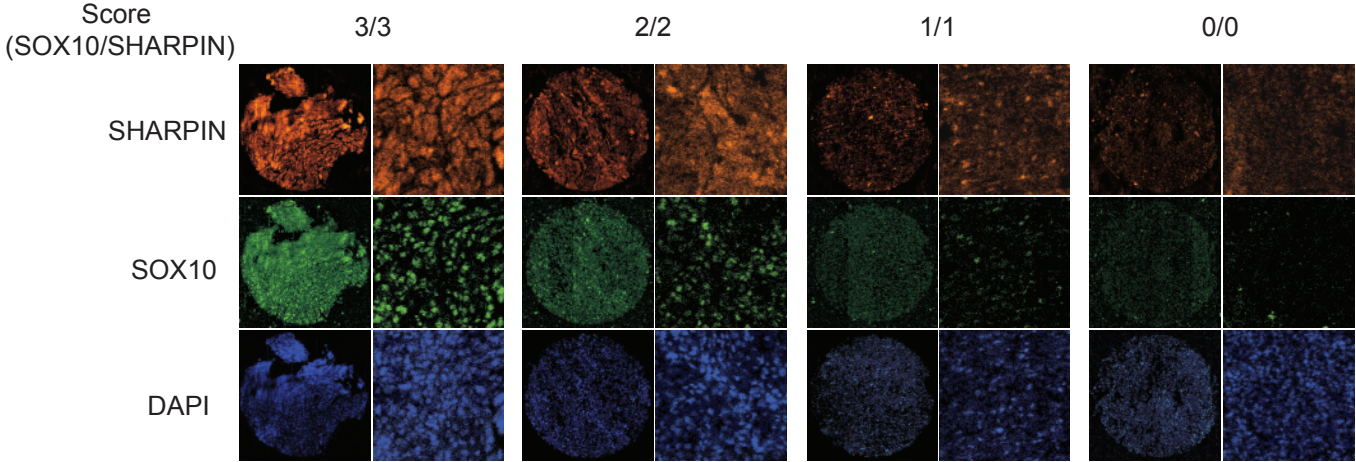

Supplementary Table S1, Tamiya et al.

| Candidate protein                                                  | Control | SHARPIN |
|--------------------------------------------------------------------|---------|---------|
| SHARPIN                                                            | 0       | 168.33  |
| Myosin-9 (MYH9)                                                    | 2       | 56.33   |
| Myosin-10 (MYH10)                                                  | 0.33    | 29.33   |
| Glutathione S-transferase P (GSTP1)                                | 6       | 25.33   |
| Vimentin OS=Homo sapiens (VIM)                                     | 7.33    | 23      |
| Clathrin heavy chain 1 (CLTC)                                      | 0.33    | 22.33   |
| Heat shock cognate 71 kDa protein (HSPA8)                          | 10      | 18.67   |
| Tubulin alpha-1A chain (TUBA1A)                                    | 3.67    | 13.33   |
| 60 kDa heat shock protein, mitochondrial (HSPD1)                   | 6.33    | 13.33   |
| 78 kDa glucose-regulated protein (HSPA5)                           | 7.67    | 13      |
| Protein arginine N-methyltransferase 5 (PRMT5)                     | 6.67    | 12.67   |
| E3 ubiquitin-protein ligase RNF31 (RNF31)                          | 0       | 11.33   |
| X-ray repair cross-complementing protein 6 (XRCC6)                 | 1       | 11.33   |
| Serum albumin (ALB)                                                | 4       | 10.33   |
| Methylosome protein 50 (WDR77)                                     | 6       | 9.67    |
| Stress-70 protein, mitochondrial (HSPA9)                           | 4.67    | 9.67    |
| Myosin regulatory light chain 12A (MYL12A)                         | 0.33    | 9.67    |
| Myosin regulatory light chain 12B (MYL12B)                         | 0.33    | 9.67    |
| Glyceraldehyde-3-phosphate dehydrogenase (GAPDH)                   | 3.67    | 9       |
| Heterogeneous nuclear ribonucleoprotein U (HNRNPU)                 | 1.67    | 8.67    |
| RNA-binding protein 10 (RBM10)                                     | 4.33    | 8       |
| Gelsolin (GSN)                                                     | 0.33    | 7.67    |
| U4/U6 small nuclear ribonucleoprotein Prp31 (PRPF31)               | 4.67    | 7.33    |
| X-ray repair cross-complementing protein 5 (XRCC5)                 | 0.67    | 7       |
| Gamma-interferon-inducible protein 16 (IFI16)                      | 0.33    | 6.33    |
| Cytoplasmic dynein 1 heavy chain 1 (DYNC1H1)                       | 4.33    | 6.33    |
| Bifunctional polynucleotide phosphatase/kinase (PNKP)              | 0       | 6       |
| Melanocyte protein PMEL (PMEL)                                     | 1.67    | 6       |
| Poly [ADP-ribose] polymerase 1 (PARP1)                             | 0.67    | 6       |
| ADP/ATP translocase 1 (SLC25A4)                                    | 2       | 5.33    |
| RanBP-type and C3HC4-type zinc finger-containing protein 1 (RBCK1) | 0       | 5       |



Supplementary Table S2, Tamiya et al.

| human          | q-PCR primers                                          | mouse        | q-PCR primers                                       |
|----------------|--------------------------------------------------------|--------------|-----------------------------------------------------|
| <i>GAPDH</i>   | AGGGCTGCTTTTAACTCTGGT<br>CCCCACTTGATTTTGGAGGGA         | <i>Gapdh</i> | CATCACTGCCACCCAGAAGACTG<br>ATGCCAGTGAGCTTCCCGTTTCAG |
| <i>HOIP</i>    | CTTTCTTCCCCTAATCCTGCAAG<br>CCCAAGGCTCATTTAGCATGG       | <i>Sox10</i> | CAGGTGTGGCTCTGCCACG<br>GTGTAGAGGGGCCGCTGGGA         |
| <i>HOIL-1L</i> | AAACACCAAGCACTCTCAGC<br>ACTGTGCAGTCTCCTTCCTG           | <i>Pax3</i>  | TGCCCTCAGTGAGTTCTATCAGC<br>GCTAAACCAGACCTGCACTCGGGC |
| <i>SHARPIN</i> | GTGGCCCTTCCCTCACAAGTCCGAC<br>CCCAACCCTGGTGACTGTCCCAGCA | <i>Mitf</i>  | AGATTTGAGATGCTCATCCCC<br>GATGCGTGATGTCATAGTGGA      |
| <i>SOX10</i>   | CCAGTACCCGCACCTGCAC<br>CTTTCGTTACAGCAGCCTCCAG          |              |                                                     |
| <i>PAX3</i>    | GGAAGTGGAGCGTGCTTTTG<br>GGCGGTTGCTAAACCAGAC            |              | ChIP primers                                        |
| <i>MITF</i>    | CCGTCTCTCACTGGATTGGT<br>TGGGTCTGCACCTGATAGTG           | <i>ST7</i>   | CCACCCAAATCTTGCTGAAT<br>AGGATTCAGGCTCAGGGAAT        |
| <i>SILV</i>    | GCTGATCGTGGGCATCTTG<br>AGTGACTGCTGCTATGTGG             | <i>SOX10</i> | GACCCTCACCGCCTTCAC<br>CGAGACTGACTGAGCGACTG          |
| <i>TYR</i>     | GCTGCCAATTTTCAGCTTTAGA<br>CCGCTATCCCAGTAAGTGGA         | <i>PAX3</i>  | TGGGGCTGTCTCTCTCAGTT<br>TTACCCAAAGCTTGGTCAGG        |
| <i>DCT</i>     | CTCAGACCAACTTGGCTACAGC<br>CAACCAAAGCCACCAGTGTTCC       |              |                                                     |
| <i>MLANA</i>   | GGACAGCAAAGTGTCTCTTCAAG<br>TCAGGTGTCTCGCTGGCTCTTA      |              |                                                     |
| <i>ST7</i>     | CCACTTGGCCTTCTCTTTC<br>GGTCCCTACAAGTGGCTTT             |              |                                                     |
| <i>RBL2</i>    | GAAGTTCGTGCTGATACTGGAGG<br>AATAGCCGCCTTCTGGTAGTGC      |              |                                                     |
| <i>SKI</i>     | CAGGAGCTGGAGTTCCTACG<br>GTGACTCGTTGGCCTCTTTC           |              |                                                     |
| <i>MTAP</i>    | GTCATAGTGACCACAGCTTGTGG<br>CCTCTGGCACAAGAATGACTTCC     |              |                                                     |
| <i>TNFA</i>    | AGGCGCTCCCCAAGAAGACA<br>TCCTTGGCAAACCTGCACCT           |              |                                                     |
| <i>IL1B</i>    | ATGATGGCTTATTACAGTGGCAA<br>AGTCGGAGATTCGTAGCTGGA       |              |                                                     |
| <i>IL6</i>     | ACTCACCTCTTCAGAACGAATTG<br>CCATCTTTGGAAGGTTTCAGGTTG    |              |                                                     |
| <i>PRMT5</i>   | GAAGAATGGGGAAGCCAAGT<br>ATGGGAGCCAGAAAGGAAGT           |              |                                                     |
